# Supplementary material for: Which Non-Pharmaceutical Primary Care Interventions Reduce Inequalities in Common Mental Health Disorders? A Protocol for a Systematic Review of Quantitative and Qualitative Studies
Source: MDPI journal article supplement (doi:10.3390/ijerph182412978), 2021-12-09
Supplement: s1 [file s1]

## PRISMA-P 2015 Checklist

This checklist has been adapted for use with protocol submissions to *Systematic Reviews* from Table 3 in Moher D et al: Preferred reporting items for systematic review and meta-analysis protocols (PRISMA-P) 2015 statement. *Systematic Reviews* 2015 4:1

| Section/topic              | #  | Checklist item                                                                                                                                                                                  | Information reported |    | Page number(s) |
|----------------------------|----|-------------------------------------------------------------------------------------------------------------------------------------------------------------------------------------------------|----------------------|----|----------------|
|                            |    |                                                                                                                                                                                                 | Yes                  | No |                |
| ADMINISTRATIVE INFORMATION |    |                                                                                                                                                                                                 |                      |    |                |
| Title                      |    |                                                                                                                                                                                                 |                      |    |                |
| Identification             | 1a | Identify the report as a protocol of a systematic review                                                                                                                                        | x                    |    | 1              |
| Update                     | 1b | If the protocol is for an update of a previous systematic review, identify as such                                                                                                              | NA                   |    |                |
| Registration               | 2  | If registered, provide the name of the registry (e.g., PROSPERO) and registration number in the Abstract                                                                                        | x                    |    | 1              |
| Authors                    |    |                                                                                                                                                                                                 |                      |    |                |
| Contact                    | 3a | Provide name, institutional affiliation, and e-mail address of all protocol authors; provide physical mailing address of corresponding author                                                   | x                    |    | 1              |
| Contributions              | 3b | Describe contributions of protocol authors and identify the guarantor of the review                                                                                                             | x                    |    | 11             |
| Amendments                 | 4  | If the protocol represents an amendment of a previously completed or published protocol, identify as such and list changes; otherwise, state plan for documenting important protocol amendments | NA                   |    |                |
| Support                    |    |                                                                                                                                                                                                 |                      |    |                |
| Sources                    | 5a | Indicate sources of financial or other support for the review                                                                                                                                   | x                    |    | 10-11          |
| Sponsor                    | 5b | Provide name for the review funder and/or sponsor                                                                                                                                               | x                    |    | 10-11          |
| Role of sponsor/funder     | 5c | Describe roles of funder(s), sponsor(s), and/or institution(s), if any, in developing the protocol                                                                                              | x                    |    | 11             |
| INTRODUCTION               |    |                                                                                                                                                                                                 |                      |    |                |
| Rationale                  | 6  | Describe the rationale for the review in the context of what is already known                                                                                                                   | x                    |    | 1-3            |
| Objectives                 | 7  | Provide an explicit statement of the question(s) the review will address with reference to participants, interventions, comparators, and outcomes (PICO)                                        | x                    |    | 3-4            |

| Section/topic                      | #   | Checklist item                                                                                                                                                                                                                              | Information reported |    | Page number(s)        |
|------------------------------------|-----|---------------------------------------------------------------------------------------------------------------------------------------------------------------------------------------------------------------------------------------------|----------------------|----|-----------------------|
|                                    |     |                                                                                                                                                                                                                                             | Yes                  | No |                       |
| METHODS                            |     |                                                                                                                                                                                                                                             |                      |    |                       |
| Eligibility criteria               | 8   | Specify the study characteristics (e.g., PICO, study design, setting, time frame) and report characteristics (e.g., years considered, language, publication status) to be used as criteria for eligibility for the review                   | x                    |    | 5-8                   |
| Information sources                | 9   | Describe all intended information sources (e.g., electronic databases, contact with study authors, trial registers, or other grey literature sources) with planned dates of coverage                                                        | x                    |    | 4                     |
| Search strategy                    | 10  | Present draft of search strategy to be used for at least one electronic database, including planned limits, such that it could be repeated                                                                                                  | x                    |    | Supplementary file S2 |
| STUDY RECORDS                      |     |                                                                                                                                                                                                                                             |                      |    |                       |
| Data management                    | 11a | Describe the mechanism(s) that will be used to manage records and data throughout the review                                                                                                                                                | x                    |    | 4-5                   |
| Selection process                  | 11b | State the process that will be used for selecting studies (e.g., two independent reviewers) through each phase of the review (i.e., screening, eligibility, and inclusion in meta-analysis)                                                 | x                    |    | 4-5                   |
| Data collection process            | 11c | Describe planned method of extracting data from reports (e.g., piloting forms, done independently, in duplicate), any processes for obtaining and confirming data from investigators                                                        | x                    |    | 8                     |
| Data items                         | 12  | List and define all variables for which data will be sought (e.g., PICO items, funding sources), any pre-planned data assumptions and simplifications                                                                                       | x                    |    | 8                     |
| Outcomes and prioritization        | 13  | List and define all outcomes for which data will be sought, including prioritization of main and additional outcomes, with rationale                                                                                                        | x                    |    | 8                     |
| Risk of bias in individual studies | 14  | Describe anticipated methods for assessing risk of bias of individual studies, including whether this will be done at the outcome or study level, or both; state how this information will be used in data synthesis                        | x                    |    | 8-9                   |
| DATA                               |     |                                                                                                                                                                                                                                             |                      |    |                       |
| Synthesis                          | 15a | Describe criteria under which study data will be quantitatively synthesized                                                                                                                                                                 | x                    |    | 9-10                  |
|                                    | 15b | If data are appropriate for quantitative synthesis, describe planned summary measures, methods of handling data, and methods of combining data from studies, including any planned exploration of consistency (e.g., $I^2$ , Kendall's tau) | x                    |    | 9                     |
|                                    | 15c | Describe any proposed additional analyses (e.g., sensitivity or subgroup analyses, meta-regression)                                                                                                                                         | x                    |    | 9                     |
|                                    | 15d | If quantitative synthesis is not appropriate, describe the type of summary planned                                                                                                                                                          | x                    |    | 9                     |

| Section/topic                            | #  | Checklist item                                                                                                              | Information reported |    | Page number(s) |
|------------------------------------------|----|-----------------------------------------------------------------------------------------------------------------------------|----------------------|----|----------------|
|                                          |    |                                                                                                                             | Yes                  | No |                |
| <b>Meta-bias(es)</b>                     | 16 | Specify any planned assessment of meta-bias(es) (e.g., publication bias across studies, selective reporting within studies) |                      | x  |                |
| <b>Confidence in cumulative evidence</b> | 17 | Describe how the strength of the body of evidence will be assessed (e.g., GRADE)                                            |                      | x  |                |
